# Supplementary material
Source: PubMed Central journal article supplement (PMC1237056)

**S1**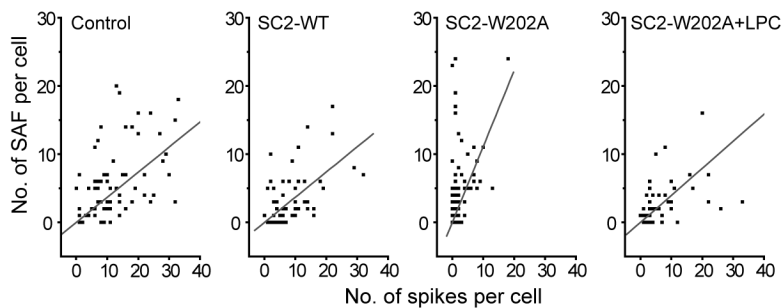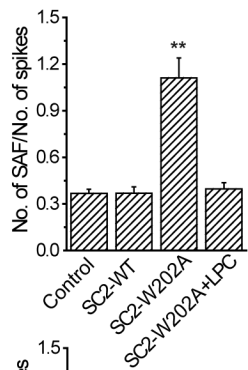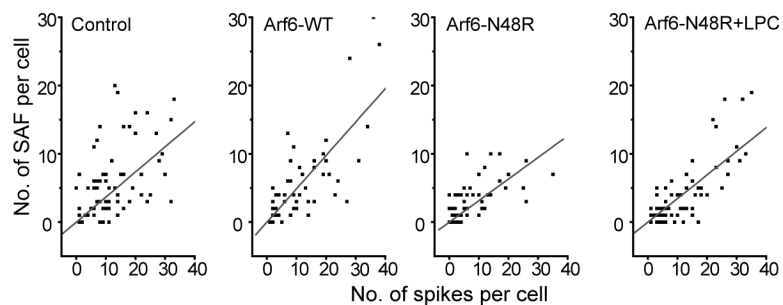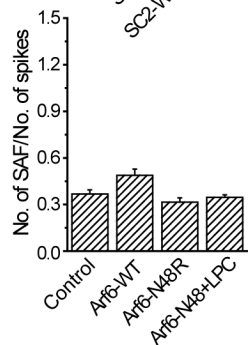**S2**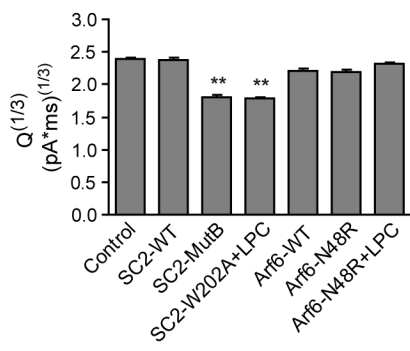

Supplement: mbc_E05-03-0231_1.pdf [file mbc_E05-03-0231_1.pdf]
